# Supplementary material
Source: PubMed Central journal article supplement (PMC4076392)
Supplement: supp_113.111393_111393SupFigS1V2.pdf [file supp_113.111393_111393SupFigS1V2.pdf]

## Supplemental Figure S1

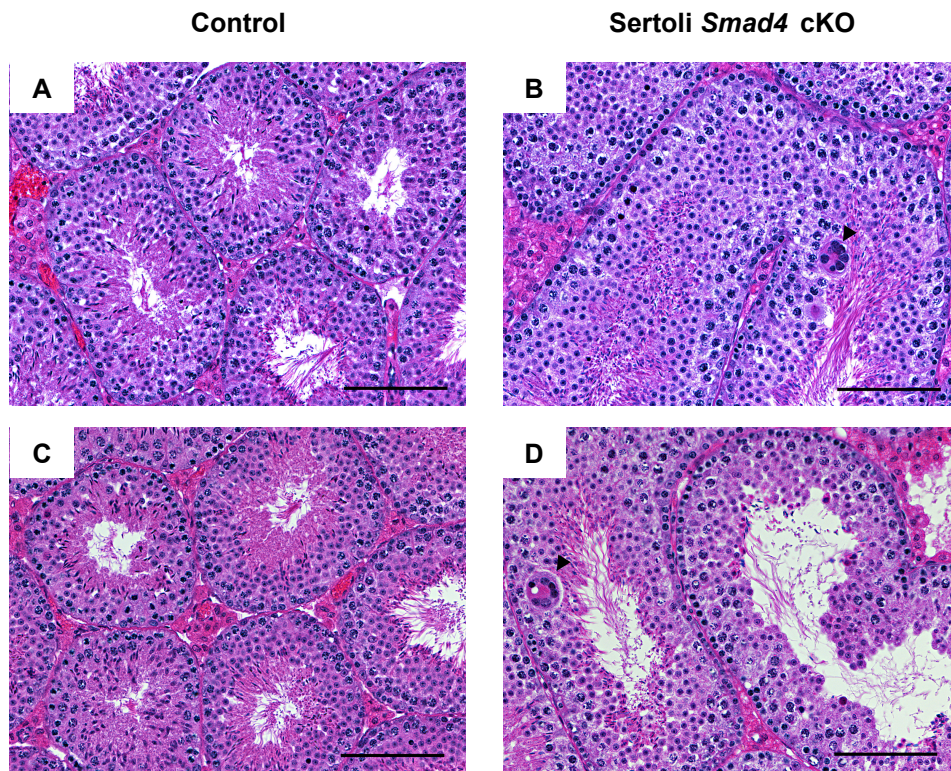

**Supplemental Figure S1:** H&E stained sections from aged (56-62 week old) control (A,C) and Sertoli *Smad4* cKO mice (B,D) shown at 20X magnification. Black arrows in (B,D) indicate abnormal multinucleated germ cells. Scale bars = 100 $\mu$ m.
